# Supplementary figures and images for: Lysosomal chloride transporter CLH-6 protects lysosome membrane integrity via cathepsin activation
Source: PubMed Central journal article supplement — J Cell Biol. 2023 Apr 14;222(6):e202210063. doi: 10.1083/jcb.202210063 (PMC10114921; doi:10.1083/jcb.202210063), 2023-04-14

Blots in Figure 4J

Figure 4J top panel

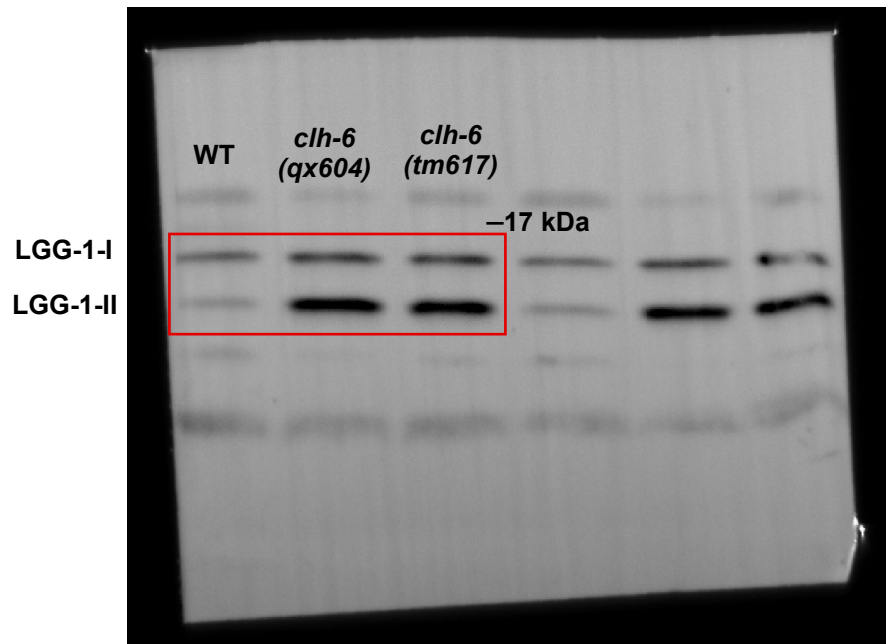

Figure 4J bottom panel

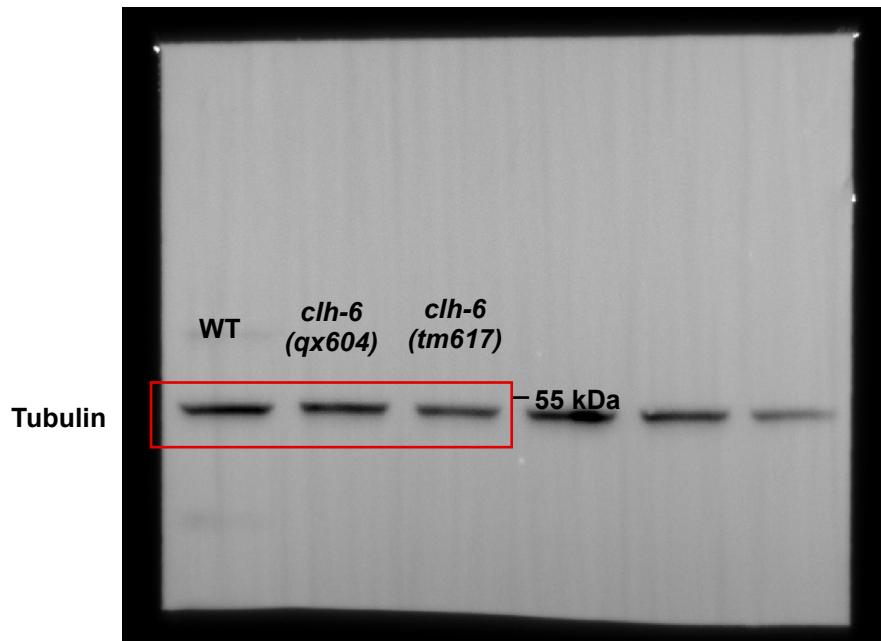

Supplement: JCB_202210063_SourceDataF4.pdf [file JCB_202210063_SourceDataF4.pdf]

Blots in Figure 8B

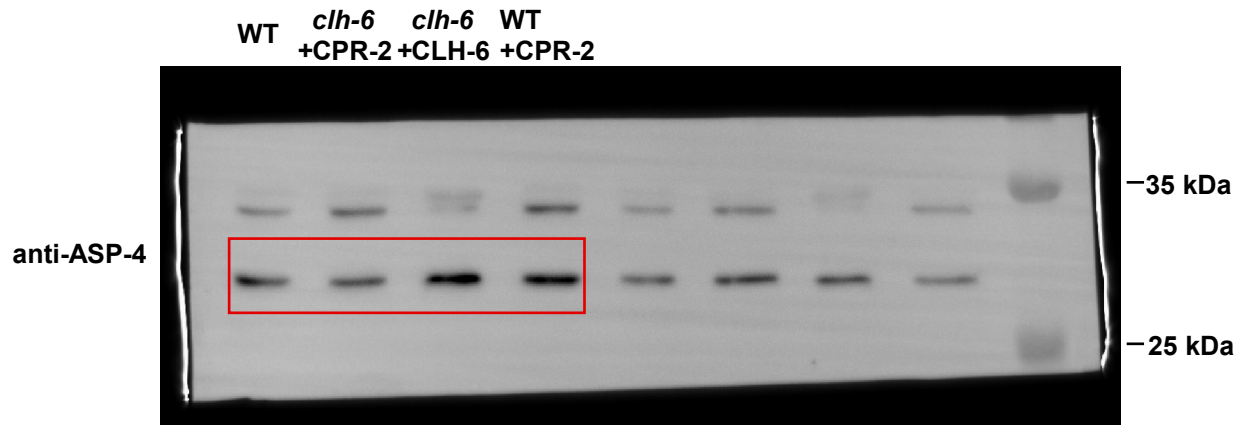

Blots in Figure 8C

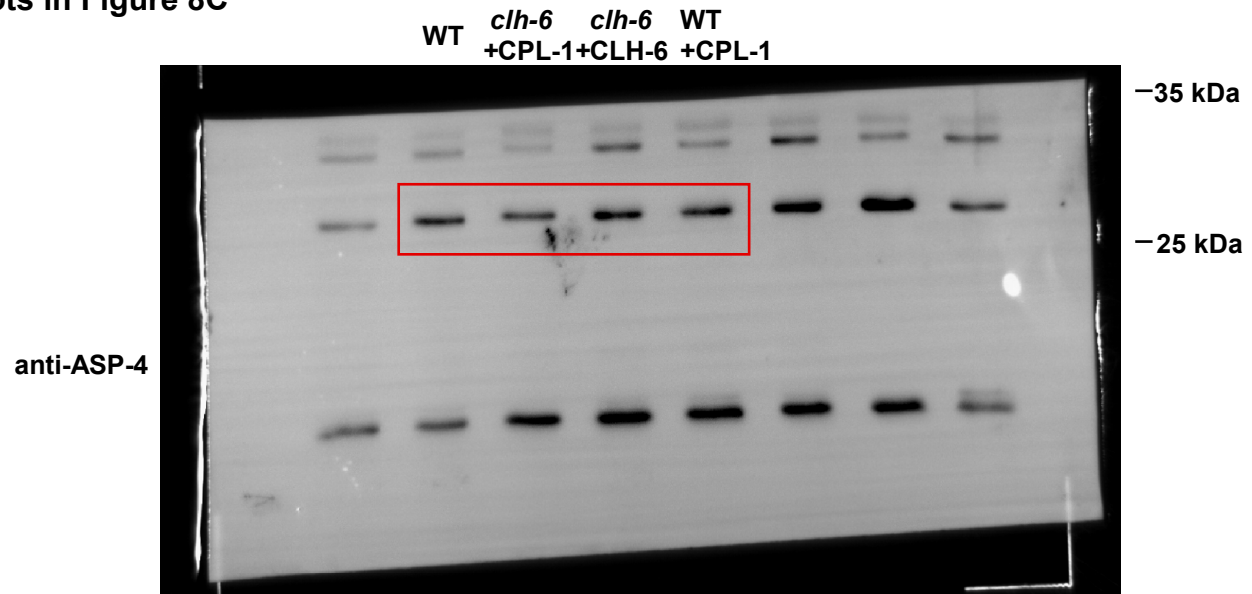

Blots in Figure 8D

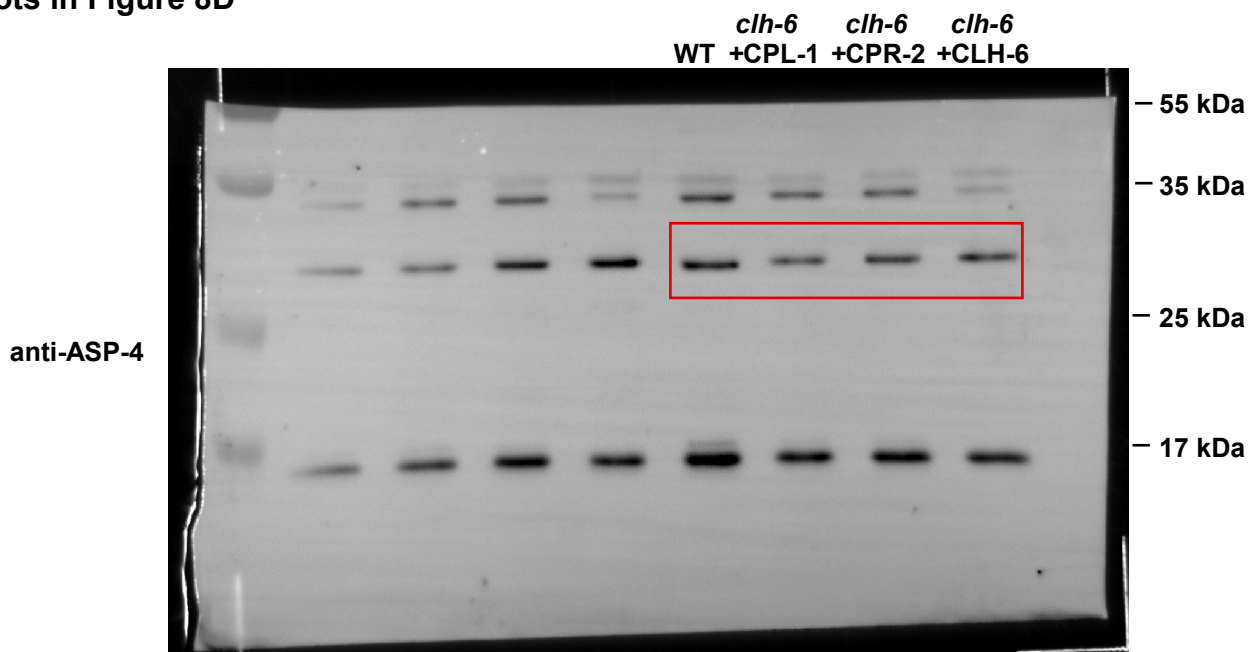

Supplement: JCB_202210063_SourceDataF8.pdf [file JCB_202210063_SourceDataF8.pdf]

# Blots in Figure S4E

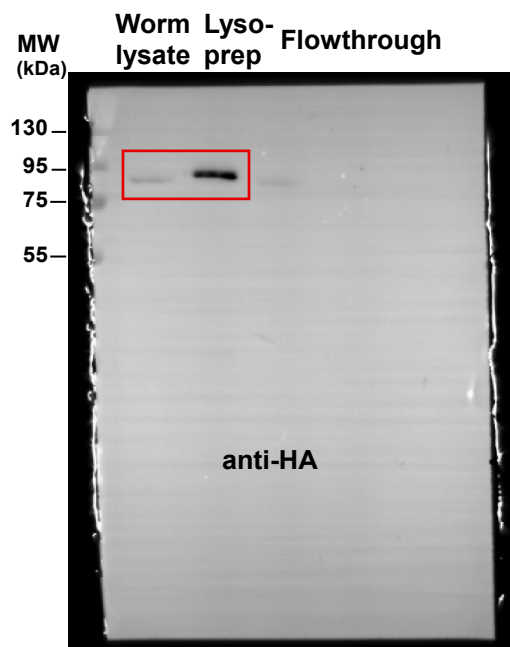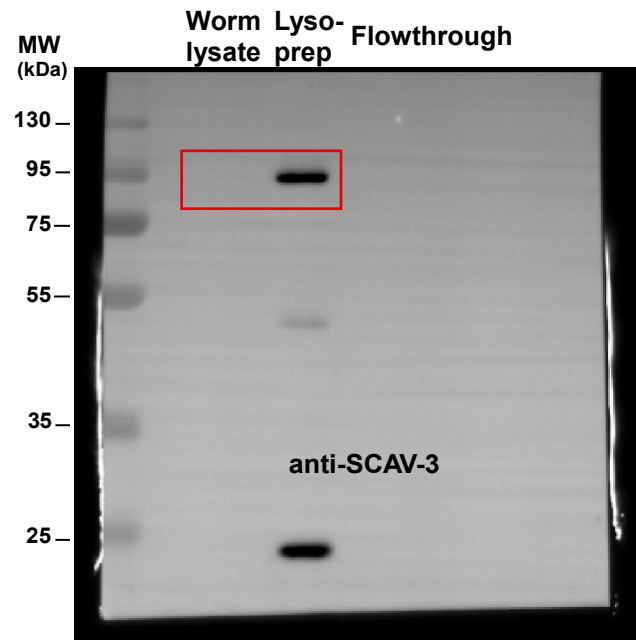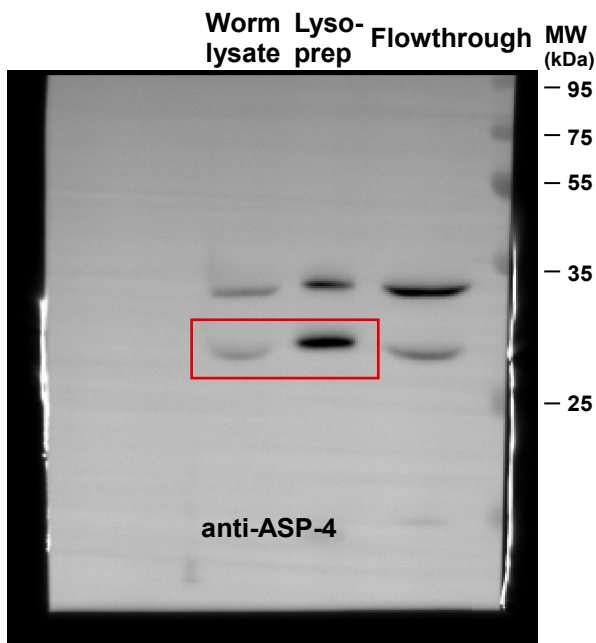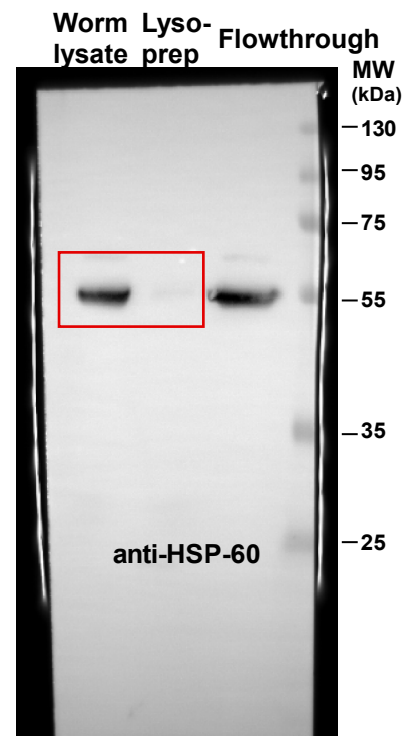

Blots in Figure S4E

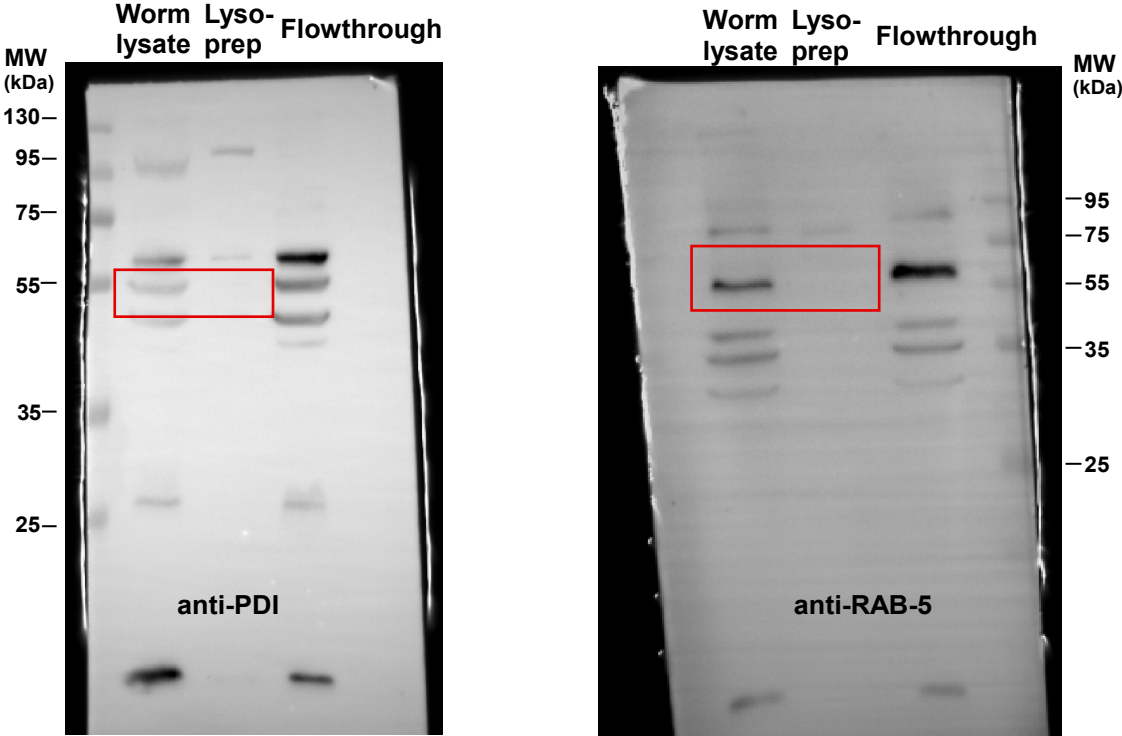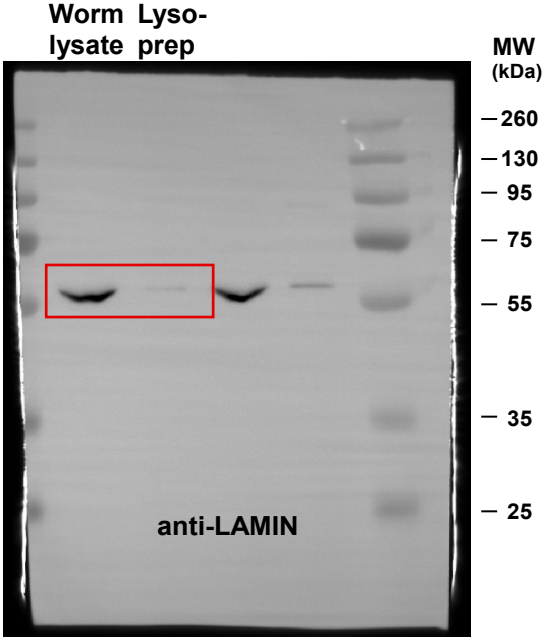

Supplement: JCB_202210063_SourceDataFS4.pdf [file JCB_202210063_SourceDataFS4.pdf]

Figure S5D

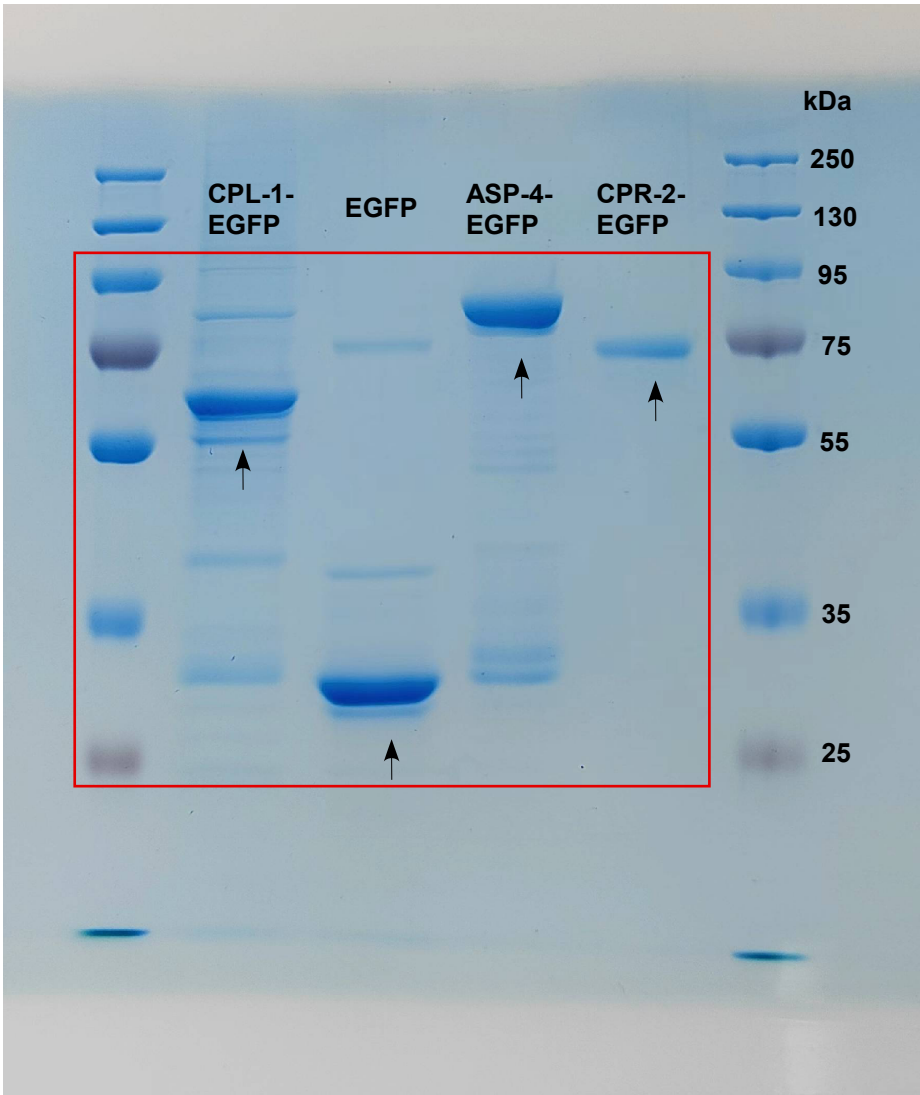

Supplement: JCB_202210063_SourceDataFS5.pdf [file JCB_202210063_SourceDataFS5.pdf]
